# Supplementary material for: Resected pancreatic ductal adenocarcinomas with recurrence limited in lung have a significantly better prognosis than those with other recurrence patterns
Source: PubMed Central journal article supplement (PMC4742219; doi:10.18632/oncotarget.5054), 2015-09-10
Supplement: oncotarget-06-36903-s001.pdf [file oncotarget-06-36903-s001.pdf]

## SUPPLEMENTARY TABLES

Supplementary Table S1: Univariate analysis for OS of all types of recurrence ( $n = 174$ )

| Variable                         | OS                |         |
|----------------------------------|-------------------|---------|
|                                  | HR(95% CI)        | P-value |
| Age                              | 0.99(0.98, 1.01)  | 0.38    |
| Gender(female vs. male)          | 0.9(0.66, 1.22)   | 0.49    |
| Stage                            |                   |         |
| II vs. I                         | 1.74(0.88, 3.44)  | 0.11    |
| III vs. I                        | 5.39(1.42, 20.45) | 0.01    |
| Lymph nodes (yes vs. no)         | 1.54(0.98, 2.42)  | 0.06    |
| Margin (positive vs. negative)   | 1.66(1.21, 2.28)  | 0.002   |
| Grade                            |                   |         |
| II vs. I                         | 0.72(0.53, 0.99)  | 0.04    |
| III vs. I                        | 0.38(0.14, 1.05)  | 0.06    |
| Vascular Invasion (yes vs. no)   | 0.98(0.7, 1.37)   | 0.89    |
| Perineural Invasion (yes vs. no) | 4.43(1.91, 10.28) | 0.001   |
| Adjuvant Radiation (yes vs. no)  | 0.61(0.38, 0.97)  | 0.04    |
| Adjuvant Chemo (yes vs. no)      | 0.63(0.37, 1.07)  | 0.09    |

HR = hazard ratio; CI = confidence interval

**Supplementary Table S2: Univariate analysis for RTD of all types of recurrence (n = 174)**

| Variables                       | HR(95% CI)        | P-value |
|---------------------------------|-------------------|---------|
| Age                             | 0.99(0.98, 1.01)  | 0.35    |
| Gender(male)                    | 0.92(0.67, 1.25)  | 0.58    |
| Margin (positive vs. negative)  | 1.37 (1.01, 1.88) | 0.05    |
| Tumor size                      | 1.1(0.98, 1.24)   | 0.10    |
| Stage                           |                   |         |
| II vs. I                        | 1.34(0.68, 2.65)  | 0.40    |
| III vs. I                       | 2.45(0.65, 9.22)  | 0.19    |
| Lymph nodes                     | 1.29(0.82, 2.03)  | 0.27    |
| Grade                           |                   |         |
| II vs. III                      | 0.91(0.66, 1.24)  | 0.54    |
| I vs. III                       | 0.49(0.18, 1.33)  | 0.16    |
| Vascular Invasion               | 1.01(0.72, 1.42)  | 0.94    |
| Perineural Invasion             | 2.82(1.29, 6.2)   | 0.01    |
| Adjuvant Radiation              | 1.27(0.8, 2.02)   | 0.31    |
| Adjuvant Chemo                  | 1.11(0.66, 1.86)  | 0.70    |
| Time from surgery to recurrence | 0.98(0.97, 1.00)  | 0.01    |
| Recurrence site                 |                   |         |
| Lung + other vs. Lung only      | 1.12(0.62, 2.02)  | 0.70    |
| Liver vs. Lung only             | 1.93(1.20, 3.11)  | 0.006   |
| Peritoneal vs. Lung only        | 5.42(2.96, 9.91)  | < 0.001 |
| Local vs. Lung only             | 2.25(1.28, 3.97)  | 0.005   |

HR = hazard ratio; CI = confidence interval

**Supplementary Table S3: Univariate analysis for STR of all types of recurrence (n = 174)**

| Variable                        | HR(95% CI)       | P-value |
|---------------------------------|------------------|---------|
| Age                             | 0.99(0.98, 1.01) | 0.32    |
| Gender(male)                    | 0.9(0.67, 1.22)  | 0.50    |
| Margin (positive vs. negative)  | 1.8(1.31, 2.46)  | < 0.001 |
| Tumor size                      | 1.3(46.98, 1.9)  | 0.92    |
| Stage                           |                  |         |
| II vs. I                        | 1.64(0.86, 3.12) | 0.13    |
| III vs. I                       | 4.1(1.26, 13.28) | 0.02    |
| Lymph node (yes vs. no)         | 1.56(1, 2.43)    | 0.05    |
| Grade                           |                  |         |
| II vs. III                      | 0.68(0.5, 0.92)  | 0.01    |
| I vs. III                       | 0.36(0.13, 0.98) | 0.05    |
| Vascular Invasion (yes vs. no)  | 1.03(0.74, 1.43) | 0.86    |
| Perineural Invasion(yes vs. no) | 2.95(1.48, 5.88) | 0.002   |
| Adjuvant Radiation(yes vs. no)  | 0.24(0.15, 0.38) | < 0.001 |
| Adjuvant Chemo(yes vs. no)      | 0.4(0.24, 0.66)  | < 0.001 |

HR = hazard ratio; CI = confidence interval

**Supplementary Table S4: Comparison of baseline characteristics by recurrence pattern**

| Variables           | No recur  | Lung       | Lung + other | Liver + other | Peritoneal  | Local       | P-value* |
|---------------------|-----------|------------|--------------|---------------|-------------|-------------|----------|
| Age, Years          | 67(±11.6) | 65.2(±8.5) | 68(±9.9)     | 63.6(±11)     | 60.4(±12.9) | 62.2(±10.1) | 0.152    |
| Gender              |           |            |              |               |             |             |          |
| Male                | 23        | 15         | 7            | 37            | 12          | 15          |          |
| Female              | 12        | 13         | 13           | 36            | 13          | 13          | 0.717    |
| Positive margins    |           |            |              |               |             |             |          |
| Yes                 | 20        | 15         | 8            | 30            | 12          | 15          |          |
| No                  | 15        | 13         | 12           | 43            | 13          | 13          | 0.683    |
| Stage               |           |            |              |               |             |             |          |
| I                   | 1         | 1          | 2            | 3             | 3           | 1           |          |
| II                  | 31        | 27         | 16           | 69            | 22          | 26          |          |
| III                 | 2         | 0          | 2            | 1             | 0           | 1           | 0.212    |
| Lymph nodes         |           |            |              |               |             |             |          |
| Yes                 | 29        | 26         | 17           | 65            | 18          | 25          |          |
| No                  | 6         | 2          | 3            | 8             | 7           | 3           | 0.185    |
| Tumor size          | 3.3(±1.1) | 2.9(±1.2)  | 3.6(±1.7)    | 3.2(±1.2)     | 3.1(±1.3)   | 3.3(±1.2)   | 0.447    |
| Grade               |           |            |              |               |             |             |          |
| Well                | 0         | 0          | 2            | 2             | 0           | 0           |          |
| Moderate            | 13        | 21         | 10           | 31            | 17          | 16          |          |
| Poor                | 21        | 7          | 8            | 40            | 8           | 12          | 0.027    |
| Vascular Invasion   |           |            |              |               |             |             |          |
| Yes                 | 19        | 13         | 12           | 31            | 10          | 18          |          |
| No                  | 15        | 13         | 6            | 27            | 12          | 8           | 0.390    |
| Perineural Invasion |           |            |              |               |             |             |          |
| Yes                 | 32        | 24         | 16           | 69            | 24          | 27          |          |
| No                  | 2         | 3          | 2            | 3             | 1           | 1           | 0.556    |
| Adjuvant Radiation  |           |            |              |               |             |             |          |
| Yes                 | 20        | 24         | 13           | 56            | 22          | 21          |          |
| No                  | 2         | 3          | 7            | 12            | 0           | 1           | 0.011    |
| Adjuvant Chemo      |           |            |              |               |             |             |          |
| Yes                 | 19        | 26         | 19           | 57            | 21          | 23          |          |
| No                  | 2         | 1          | 1            | 11            | 2           | 3           | 0.389    |

\*The *p*-value only pertains to groups with recurrences. The group with no recurrence was not included for comparison. Comparisons were performed using ANOVA for continuous variables and Exact Pearson Chi square test for categorical variables.

**Supplementary Table S5: Univariate analysis for the association between delayed diagnosis of lung nodules as recurrence and RTD (*n* = 24)**

| Variable                                         | HR(95% CI)        | P-value |
|--------------------------------------------------|-------------------|---------|
| Age                                              | 0.98(0.91, 1.04)  | 0.448   |
| Gender (male vs. female)                         | 0.84(0.38, 1.85)  | 0.659   |
| Margin (positive vs. negative)                   | 0.93(0.42, 2.05)  | 0.850   |
| Tumor size                                       | 1.05(0.74, 1.51)  | 0.779   |
| Lymph nodes (yes vs. no)                         | 4.07(0.53, 31.29) | 0.177   |
| Grade                                            |                   |         |
| II vs. III                                       | 1.21(0.49, 2.97)  | 0.681   |
| II vs. III                                       | -                 | -       |
| Vascular Invasion (yes vs. no)                   | 0.78(0.34, 1.78)  | 0.556   |
| Perineural Invasion (yes vs. no)                 | 2.1(0.48, 9.27)   | 0.325   |
| Adjuvant Radiation (yes vs. no)                  | 2.42(0.68, 8.55)  | 0.171   |
| Adjuvant Chemo (yes vs. no)                      | 0.67(0.09, 5.18)  | 0.702   |
| Time from surgery to recurrence                  | 0.99(0.96, 1.02)  | 0.416   |
| Delayed diagnosis of lung recurrence(yes vs. no) | 2.02(0.77, 5.34)  | 0.155   |
| Treatment after lung recurrence (Yes vs. no)     | 0.88 (0.39, 1.95) | 0.745   |

HR = hazard ratio; CI = confidence interval
